# Supplementary material
Source: PubMed Central journal article supplement (PMC8172431)
Supplement: NIHMS1686836-supplement-1.pdf [file NIHMS1686836-supplement-1.pdf]

Supplementary Material:

ST1. Search Strategy

| Database | Search Terms                                                                                                                                                                                                                                                               |
|----------|----------------------------------------------------------------------------------------------------------------------------------------------------------------------------------------------------------------------------------------------------------------------------|
| PubMed   | “discrimination”[text word] OR “discrimination”[Title/Abstract] OR “racism”[MeSH Terms] OR “racism”[Title/Abstract] AND “allostatic load”[text word] OR “allostatic load”[Title/Abstract] OR “allostatic load” OR “allostasis”[MeSH Terms] OR “allostasis”[Title/Abstract] |
